# Supplementary material
Source: PubMed Central journal article supplement (PMC10173123)

## Cough Peak Flow (L/min): unassisted versus MI-E in studies without ALS

| Studies                                              | Estimate (95% C.I.)             |
|------------------------------------------------------|---------------------------------|
| Cesareo, n=20 2018                                   | 1.600 (-77.202, 80.402)         |
| Chatwin, n=22 2003                                   | 66.000 (6.286, 125.714)         |
| Kim, n=40 2016                                       | 81.500 (65.133, 97.867)         |
| Lacombe, n=18 2014                                   | 91.902 (51.223, 132.581)        |
| Lalmolda, n=21 2019                                  | 123.100 (87.421, 158.779)       |
| Winck other NMDs, n=7 2004                           | 68.334 (3.252, 133.416)         |
| <b>Overall (I<sup>2</sup>=47.96 % ,<br/>P=0.087)</b> | <b>83.089 (59.414, 106.764)</b> |

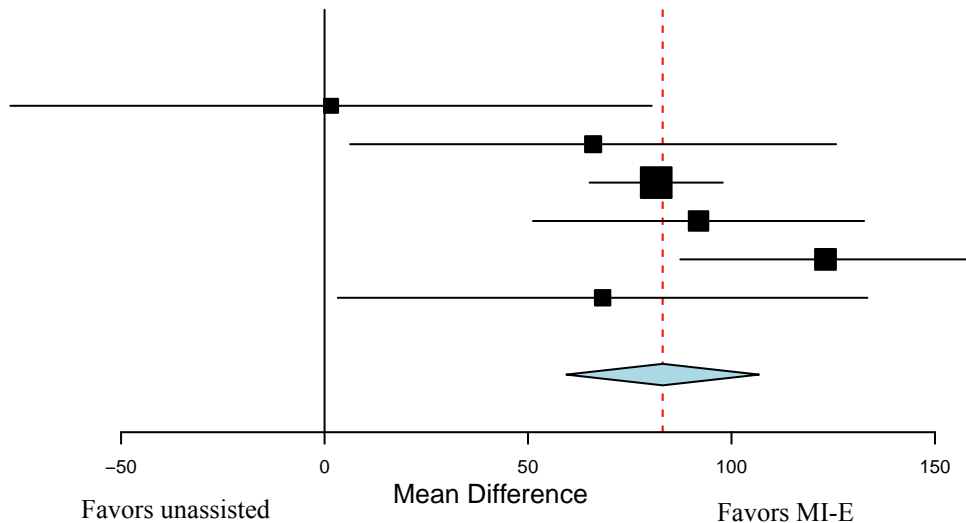

Supplement: rc-09664-File009.pdf [file rc-09664-File009.pdf]
